# Supplementary material for: Effect of Chronic Corticosterone Treatment on Depression-Like Behavior and Sociability in Female and Male C57BL/6N Mice
Source: MDPI journal article supplement (doi:10.3390/cells8091018), 2019-09-01
Supplement: s1 [file s1]

**Supplementary Table S1. Statistical summary of results**

| Experiments | Sex    | Comparison        | Measurement                 | Statistical test       | ANOVA factors | Statistics | Degrees of freedom    | P-value            | Figures |
|-------------|--------|-------------------|-----------------------------|------------------------|---------------|------------|-----------------------|--------------------|---------|
| Bodyweight  | female | Vehicle1 vs CORT1 | % of baseline weight        | Repeated measure ANOVA | Time          | F = 73.82  | df1 = 7 ; df2 = 12    | <b>P&lt;0.0001</b> | 1b      |
|             |        |                   |                             |                        | Treatment     | F = 9.20   | df1 = 1 ; df2 = 12    | <b>0.0100</b>      |         |
|             |        |                   |                             |                        | Interaction   | F = 4.16   | df1 = 7 ; df2 = 12    | <b>0.0010</b>      |         |
|             |        | Vehicle2 vs CORT2 |                             |                        | Time          | F = 48.50  | df1 = 5.05 ; df2 = 13 | <b>P&lt;0.0001</b> | 1c      |
|             |        |                   |                             |                        | Treatment     | F = 5.77   | df1 = 1 ; df2 = 13    | <b>0.0320</b>      |         |
|             |        |                   |                             |                        | Interaction   | F = 2.11   | df1 = 5.05 ; df2 = 13 | 0.0750             |         |
|             | male   | Vehicle1 vs CORT1 |                             |                        | Time          | F = 68.92  | df1 = 3.61 ; df2 = 17 | <b>P&lt;0.0001</b> | 1d      |
|             |        |                   |                             |                        | Treatment     | F = 7.76   | df1 = 1 ; df2 = 17    | <b>0.0130</b>      |         |
|             |        |                   |                             |                        | Interaction   | F = 5.26   | df1 = 3.61 ; df2 = 17 | <b>0.0010</b>      |         |
|             |        | Vehicle2 vs CORT2 |                             |                        | Time          | F = 74.34  | df1 = 3.56 ; df2 = 17 | <b>P&lt;0.0001</b> | 1e      |
|             |        |                   |                             |                        | Treatment     | F = 1.49   | df1 = 1 ; df2 = 17    | 0.239              |         |
|             |        |                   |                             |                        | Interaction   | F = 4.22   | df1 = 3.56 ; df2 = 17 | <b>0.0060</b>      |         |
| SPT         | female | Vehicle1 vs CORT1 | Relative sucrose preference | Unpaired t-test        |               | t = 0.19   | df1 = 8.20            | 0.8566             | 2a      |
|             |        | Vehicle2 vs CORT2 |                             | Welch t-test           |               | t = 1.37   | df1 = 14.00           | 0.1923             | 2b      |
|             | male   | Vehicle1 vs CORT1 |                             | Unpaired t-test        |               | t = 1.07   | df1 = 12.98           | 0.3032             | 2c      |
|             |        | Vehicle2 vs CORT2 |                             | Welch t-test           |               | t = 0.55   | df1 = 22.00           | 0.5876             | 2d      |

| NSF | female | Vehicle1 vs CORT1 | Relative latency to first bite | Welch t-test           |                   | t = 0.79  | df1 = 13.23        | 0.4421             | 3a |
|-----|--------|-------------------|--------------------------------|------------------------|-------------------|-----------|--------------------|--------------------|----|
|     |        | Vehicle2 vs CORT2 |                                | Unpaired t-test        |                   | t = 3.88  | df1 = 23.00        | <b>0.0008</b>      | 3b |
|     | male   | Vehicle1 vs CORT1 |                                | Welch t-test           |                   | t = 2.13  | df1 = 18.12        | <b>0.0476</b>      | 3c |
|     |        | Vehicle2 vs CORT2 |                                | Unpaired t-test        |                   | t = 2.43  | df1 = 26.00        | <b>0.0220</b>      | 3d |
| SI  | female | Vehicle1 vs CORT1 | Relative social interaction    | Repeated measure ANOVA | Social preference | F = 4.41  | df1 = 1 ; df2 = 24 | <b>0.0351</b>      | 4b |
|     |        |                   |                                |                        | Treatment         | F = 0.02  | df1 = 1 ; df2 = 24 | 0.8820             |    |
|     |        |                   |                                |                        | Interaction       | F = 1.26  | df1 = 1 ; df2 = 24 | 0.2720             |    |
|     |        | Vehicle2 vs CORT2 |                                |                        | Social preference | F = 4.70  | df1 = 1 ; df2 = 24 | <b>0.0400</b>      | 4c |
|     |        |                   |                                |                        | Treatment         | F = 0.03  | df1 = 1 ; df2 = 24 | 0.8720             |    |
|     |        |                   |                                |                        | Interaction       | F = 2.51  | df1 = 1 ; df2 = 24 | 0.1260             |    |
|     | male   | Vehicle1 vs CORT1 |                                |                        | Social preference | F = 2.71  | df1 = 1 ; df2 = 26 | 0.1120             | 4d |
|     |        |                   |                                |                        | Treatment         | F = 0.03  | df1 = 1 ; df2 = 26 | 0.8740             |    |
|     |        |                   |                                |                        | Interaction       | F = 0.46  | df1 = 1 ; df2 = 26 | 0.5060             |    |
|     |        | Vehicle2 vs CORT2 |                                |                        | Social preference | F = 26.37 | df1 = 1 ; df2 = 26 | <b>P&lt;0.0001</b> | 4e |
|     |        |                   |                                |                        | Treatment         | F = 0.21  | df1 = 1 ; df2 = 26 | 0.6500             |    |
|     |        |                   |                                |                        | Interaction       | F = 0.47  | df1 = 1 ; df2 = 26 | 0.4999             |    |
| FST | female | Vehicle1 vs CORT1 | Relative immobility            | Unpaired t-test        |                   | t = 0.66  | df1 = 26.00        | 0.5125             | 5a |
|     |        | Vehicle2 vs CORT2 |                                | Unpaired t-test        |                   | t = 2.33  | df1 = 21.00        | <b>0.0298</b>      | 5b |

|                  |        |                   |                           |                 |  |          |             |               |           |
|------------------|--------|-------------------|---------------------------|-----------------|--|----------|-------------|---------------|-----------|
|                  | male   | Vehicle1 vs CORT1 |                           | Unpaired t-test |  | t = 0.96 | df1 = 22.00 | 0.3493        | 5c        |
|                  |        | Vehicle2 vs CORT2 |                           | Welch t-test    |  | t = 1.53 | df1 = 18.39 | 0.8798        | 5d        |
| Food consumption | female | Vehicle1 vs CORT1 | Relative food consumption | Unpaired t-test |  | t = 0.24 | df1 = 24.00 | 0.8115        | Suppl. 1a |
|                  |        | Vehicle2 vs CORT2 |                           | Unpaired t-test |  | t = 1.15 | df1 = 24.00 | 0.2622        | Suppl. 1b |
|                  | male   | Vehicle1 vs CORT1 |                           | Unpaired t-test |  | t = 1.09 | df1 = 21.00 | 0.2877        | Suppl. 1c |
|                  |        | Vehicle2 vs CORT2 |                           | Unpaired t-test |  | t = 0.46 | df1 = 24.00 | 0.6510        | Suppl. 1d |
| Body Weight loss | female | Vehicle1 vs CORT1 | Relative body weight loss | Unpaired t-test |  | t = 1.16 | df1 = 23.00 | 0.2565        | Suppl. 1e |
|                  |        | Vehicle2 vs CORT2 |                           | Unpaired t-test |  | t = 0.74 | df1 = 25.00 | 0.4637        | Suppl. 1f |
|                  | male   | Vehicle1 vs CORT1 |                           | Unpaired t-test |  | t = 1.05 | df1 = 22.00 | 0.3032        | Suppl. 1g |
|                  |        | Vehicle2 vs CORT2 |                           | Unpaired t-test |  | t = 1.61 | df1 = 25.00 | 0.1209        | Suppl. 1h |
| Drinking volume  | female | Vehicle1 vs CORT1 | Relative drinking volume  | Unpaired t-test |  | t = 0.75 | df1 = 26.00 | 0.4595        | Suppl. 2a |
|                  |        | Vehicle2 vs CORT2 |                           | Unpaired t-test |  | t = 1.09 | df1 = 28.00 | 0.2841        | Suppl. 2b |
|                  | male   | Vehicle1 vs CORT1 |                           | Welch t-test    |  | t = 1.98 | df1 = 16.35 | 0.0653        | Suppl. 2c |
|                  |        | Vehicle2 vs CORT2 |                           | Welch t-test    |  | t = 2.49 | df1 = 17.46 | <b>0.0234</b> | Suppl. 2d |

### Posthoc pairwise comparison for bodyweight and Social Interaction test

| Experiment | Sex    | Comparison        |            | Statistical test            | P-value            | Figure |
|------------|--------|-------------------|------------|-----------------------------|--------------------|--------|
| Bodyweight | female | Vehicle1 vs CORT1 | Week 1     | Posthoc pairwise comparison | <b>0.001</b>       | 1b     |
|            |        | Vehicle1 vs CORT1 | Week 2     |                             | <b>0.017</b>       |        |
|            |        | Vehicle1 vs CORT1 | Week 3     |                             | <b>0.002</b>       |        |
|            |        | Vehicle1 vs CORT1 | Week 4     |                             | <b>0.047</b>       |        |
|            |        | Vehicle1 vs CORT1 | Week 5-8   |                             | P>0.05             |        |
|            |        | Vehicle2 vs CORT2 | Week1-8    | No interaction              |                    | 1c     |
|            | male   | Vehicle1 vs CORT1 | Week 3     | Posthoc pairwise comparison | <b>0.004</b>       | 1d     |
|            |        | Vehicle1 vs CORT1 | Week 4     |                             | <b>0.006</b>       |        |
|            |        | Vehicle1 vs CORT1 | Week 6     |                             | <b>0.033</b>       |        |
|            |        | Vehicle1 vs CORT1 | Week 7     |                             | <b>0.048</b>       |        |
|            |        | Vehicle1 vs CORT1 | Week 8     |                             | <b>0.003</b>       |        |
|            |        | Vehicle1 vs CORT1 | Week 1,2,5 |                             | P>0.05             |        |
|            |        | Vehicle2 vs CORT2 | Week 1     |                             | <b>P&lt;0.0001</b> | 1e     |
|            |        | Vehicle2 vs CORT2 | Week 2-8   |                             | P>0.05             |        |

|    |        |              |                       |                                |                    |    |
|----|--------|--------------|-----------------------|--------------------------------|--------------------|----|
| SI | female | Vehicle1     | Object vs<br>Stranger | Posthoc pairwise<br>comparison | <b>0.0318</b>      | 4b |
|    |        | CORT1        |                       |                                | P>0.05             |    |
|    |        | Vehicle2     |                       |                                | <b>0.0139</b>      | 4c |
|    |        | CORT2        |                       |                                | P>0.05             |    |
|    | male   | Vehicle1     |                       |                                | P>0.05             | 4d |
|    |        | CORT1        |                       |                                | P>0.05             |    |
|    |        | Vehicle2     |                       |                                | <b>P&lt;0.0001</b> | 4e |
|    |        | <b>CORT2</b> |                       |                                | <b>0.0040</b>      |    |
